# Supplementary material for: Cu assisted loading of Pt on CeO2 as a carbon-free catalyst for methanol and oxygen reduction reaction
Source: Royal Society of Chemistry journal article supplement (doi:10.1039/d1ra05501a), 2021-01-01
Supplement: d1ra05501a1.pdf [file d1ra05501a1.pdf]

**Electronic Supplementary Information**

**Cu assisted loading of Pt on CeO<sub>2</sub> as carbon-free catalyst for  
methanol and oxygen reduction reaction**

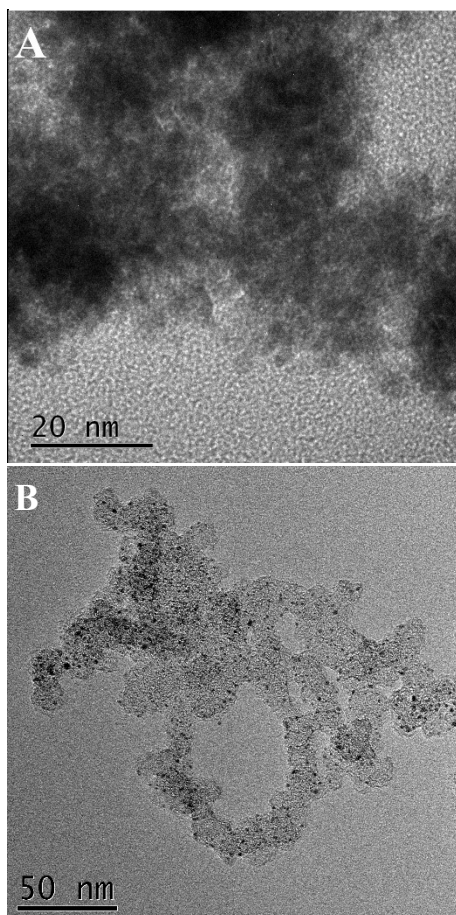

Figure S1 The TEM images of PtCu/CeO<sub>2</sub>-12 (A) and Pt/C (B). The Pt NPs of Pt/C are highly dispersive on carbon support.

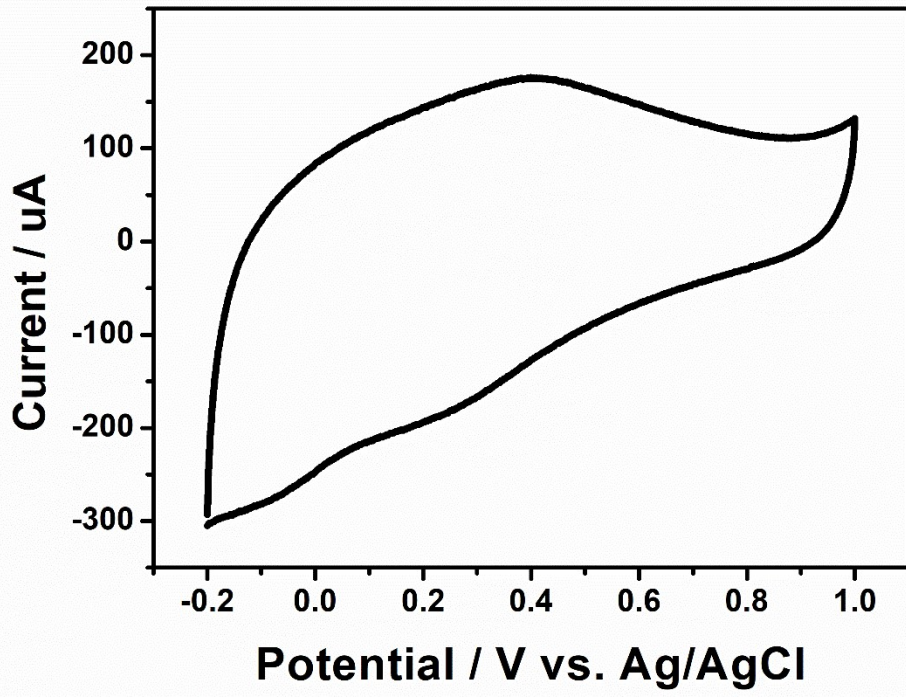

Figure S2 The CV curve of Pt/CeO<sub>2</sub>.

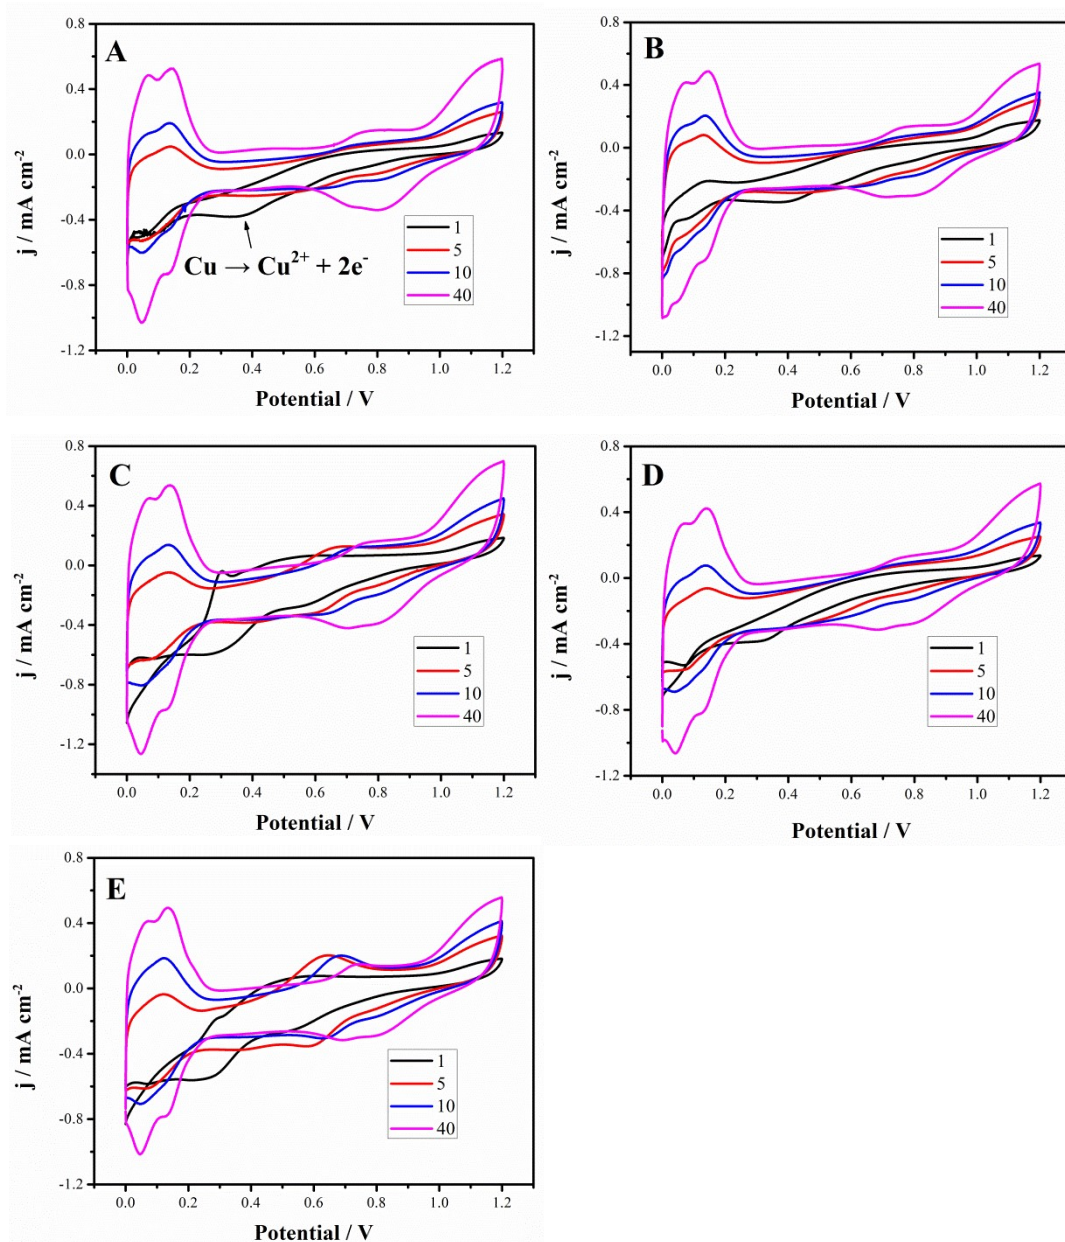

Figure S3 The first (black), fifth (red), tenth (blue), and fortieth (magenta) of Pt loading on Cu-CeO<sub>2</sub>-31(A), Cu-CeO<sub>2</sub>-21 (B), Cu-CeO<sub>2</sub>-11 (C), Cu-CeO<sub>2</sub>-12 (D), and Cu-CeO<sub>2</sub>-13 (E) in 0.5 M H<sub>2</sub>SO<sub>4</sub> and 3.86 × 10<sup>-3</sup> M H<sub>2</sub>PtCl<sub>6</sub>, the scanning rate was 50 mV s<sup>-1</sup>.

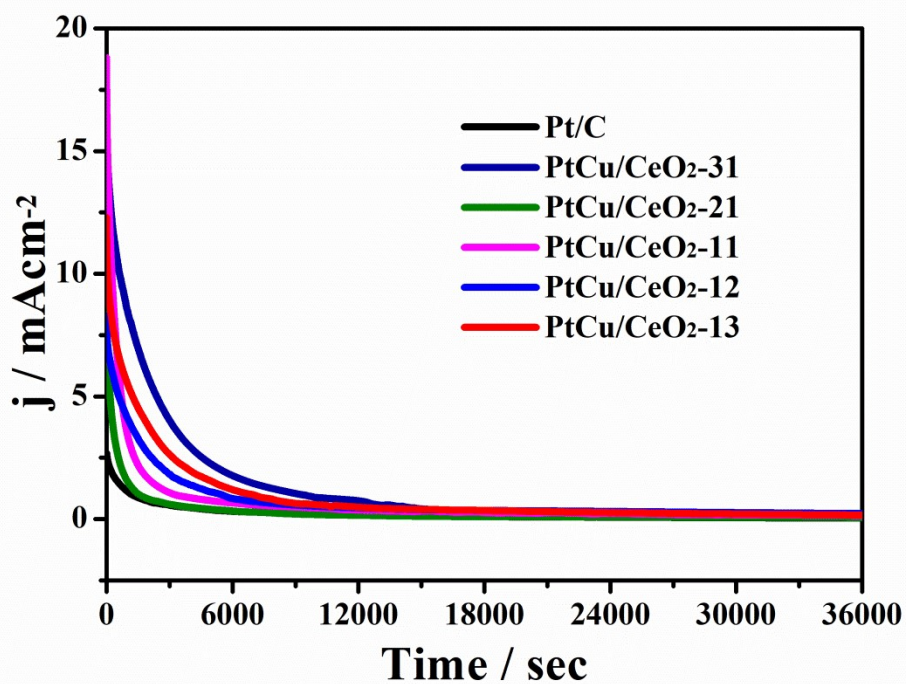

Figure S4 The chronoamperometry running for 36000 s at the constant potential of 0.6 V in 0.5 M H<sub>2</sub>SO<sub>4</sub> and 1 M CH<sub>3</sub>OH. After 10 continuous running, the current densities of Pt/C and Pt/Cu-CeO<sub>2</sub> catalysts were very close to zero, showing that all catalysts were deactivated almost to death by poisoning species such as CO<sub>ads</sub>.



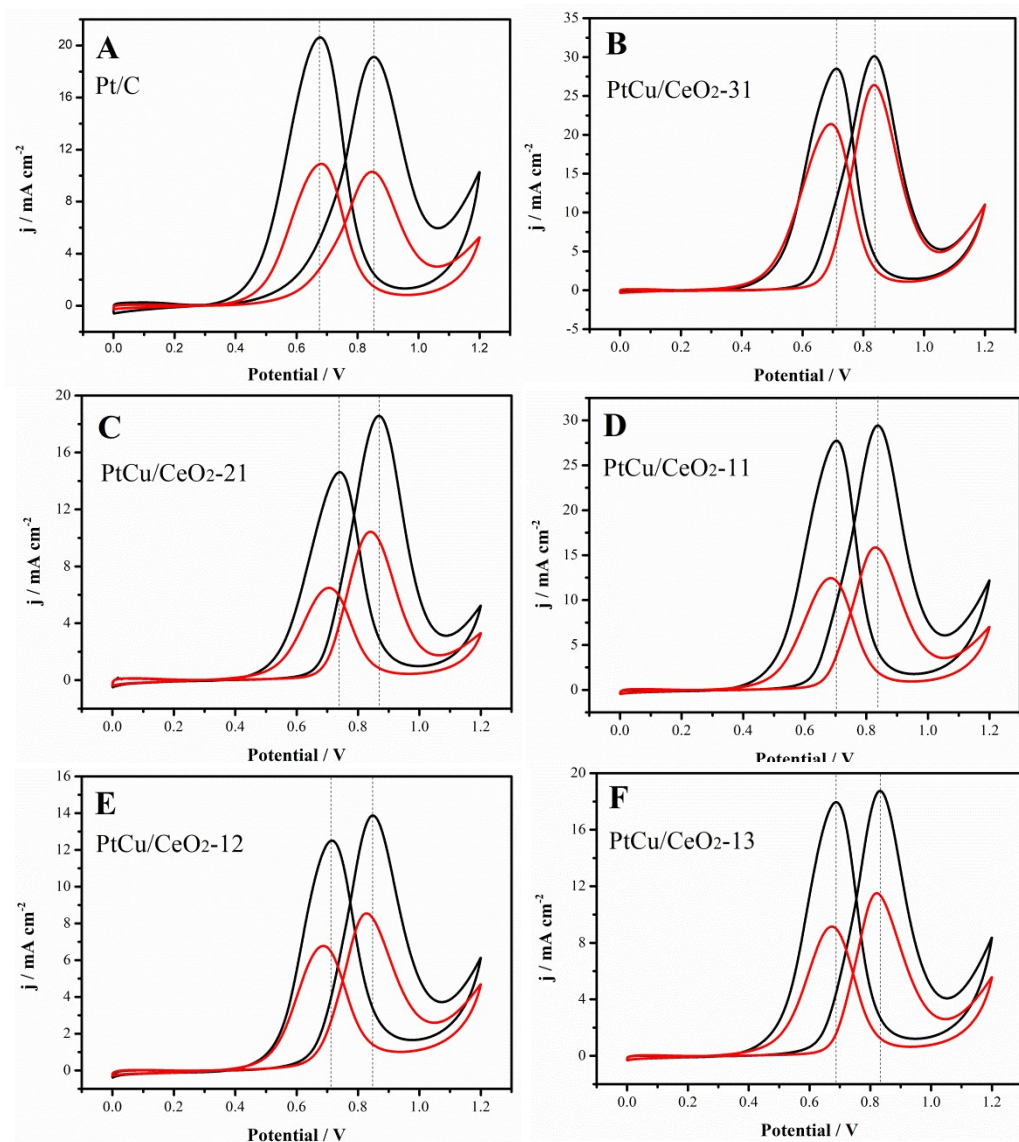

Figure S5 The methanol oxidation before (black) and after (red) chronoamperometry experiments in 1M CH<sub>3</sub>OH and 0.5 M H<sub>2</sub>SO<sub>4</sub>. The scanning rate was 50 mV s<sup>-1</sup>. The red curves were obtained right after 10 h continuous chronoamperometry running, therefore, they reflect the inherent MOR activity of catalysts.

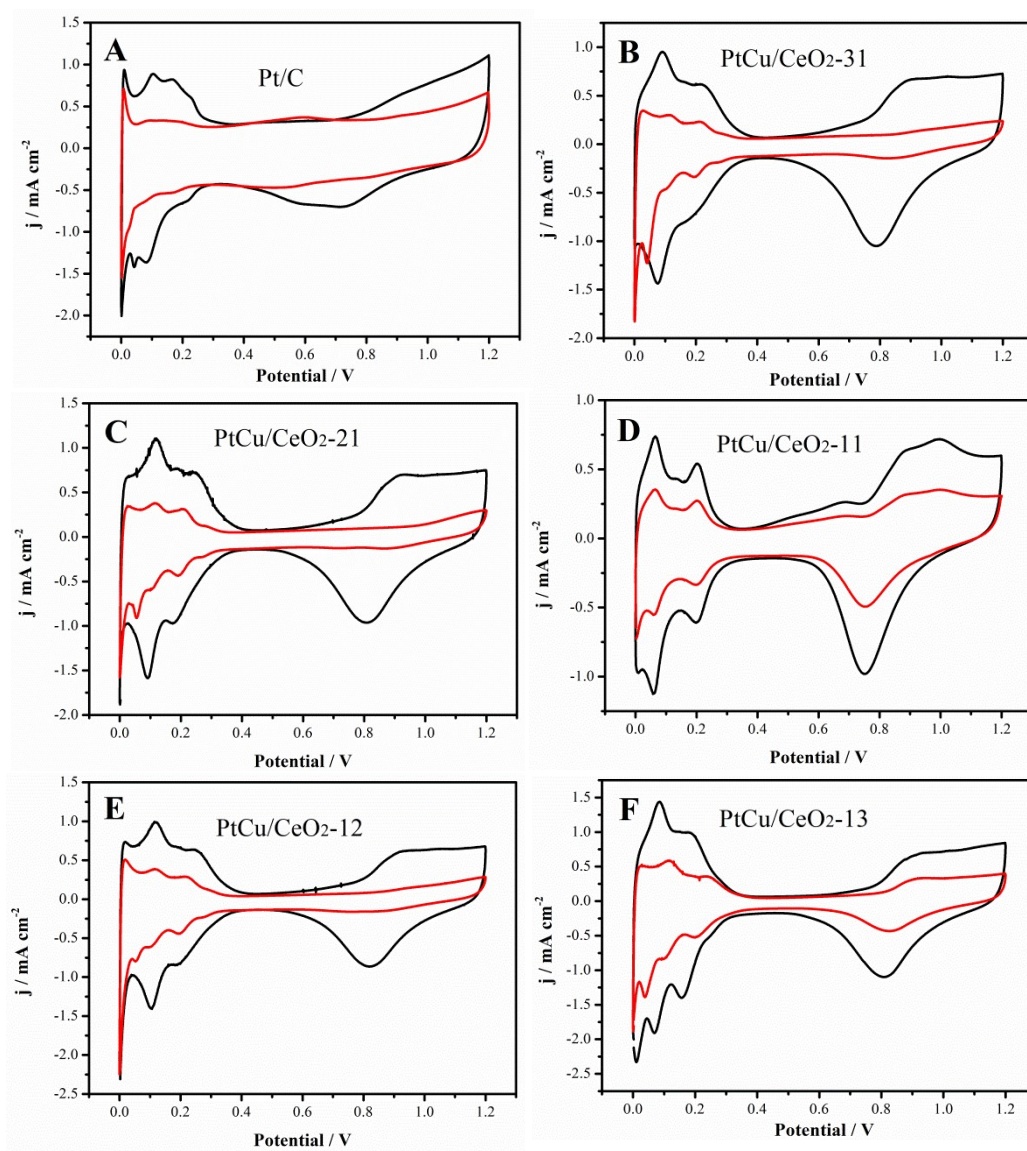

Figure S6 The CVs before (black) and after (red) ADT in 0.5 M H<sub>2</sub>SO<sub>4</sub>. The scanning rate was 50 mV s<sup>-1</sup>.
